# Supplementary material for: Understanding of the functional role(s) of the Activating Transcription Factor 4(ATF4) in HIV regulation and production
Source: PubMed Central journal article supplement — BMB Rep. 2018 Aug 31;51(8):388–93. doi: 10.5483/BMBRep.2018.51.8.054 (PMC6130831; doi:10.5483/bmbrep.2018.51.8.054), 2018-08-31
Supplement: BMB-51-388_Supple.pdf [file BMB-51-388_Supple.pdf]

**SUPPLEMENTARY TABLE 1.**

| <b>Vector</b>                   | <b>Sequences</b>                                                                             |
|---------------------------------|----------------------------------------------------------------------------------------------|
| <b>pCMV-Flag/ATF4 Wild type</b> | F: 5'-AAA <u>AGATCT</u> ACCGAA ATGAGCTTC-3'<br>R: 5'-AAA <u>CGGCCG</u> CTAGGGGACCCTTTT-3'    |
| <b>pCMV-Flag/ATF4 1-280</b>     | F: 5'-AAA <u>AGATCT</u> ACCGAA ATGAGCTTC-3'<br>R: 5'-AA A <u>AGCTTT</u> CAATCCAGTTTCTCACC-3' |
| <b>pCMV-Flag/ATF4 86-351</b>    | F: 5'-AAA <u>AGATCT</u> TTGGAGAAAATGGAT-3'<br>R: 5'-AAA <u>AAGCTT</u> CTAGGGGACCCTTTT-3'     |
| <b>pCMV-Flag/ATF4 86-280</b>    | F: 5'-AAA <u>AGATCT</u> TTGGAGAAAATGGAT-3'<br>R: 5'-AAA <u>AAGCTT</u> CAATCCAGTTTCTCACC-3'   |
| <b>pGL3-U3RU5/EGFP</b>          | F: 5' - AAA <u>CCATGG</u> GCCATTTATCTAATTC-3'<br>R: 5' -ATCCT <u>TCTAGA</u> TTACTTGTACAG-3'  |
